# Supplementary material for: Prognostic signatures associated with high infiltration of Tregs in bone metastatic prostate cancer
Source: publisher site journal article supplement (doi:10.18632/aging.203234), 2021-07-06
Supplement: Supplementary file [file aging-v13i13-203234-supplementary-material-SD1.pdf]

SUPPLEMENTARY FIGURES

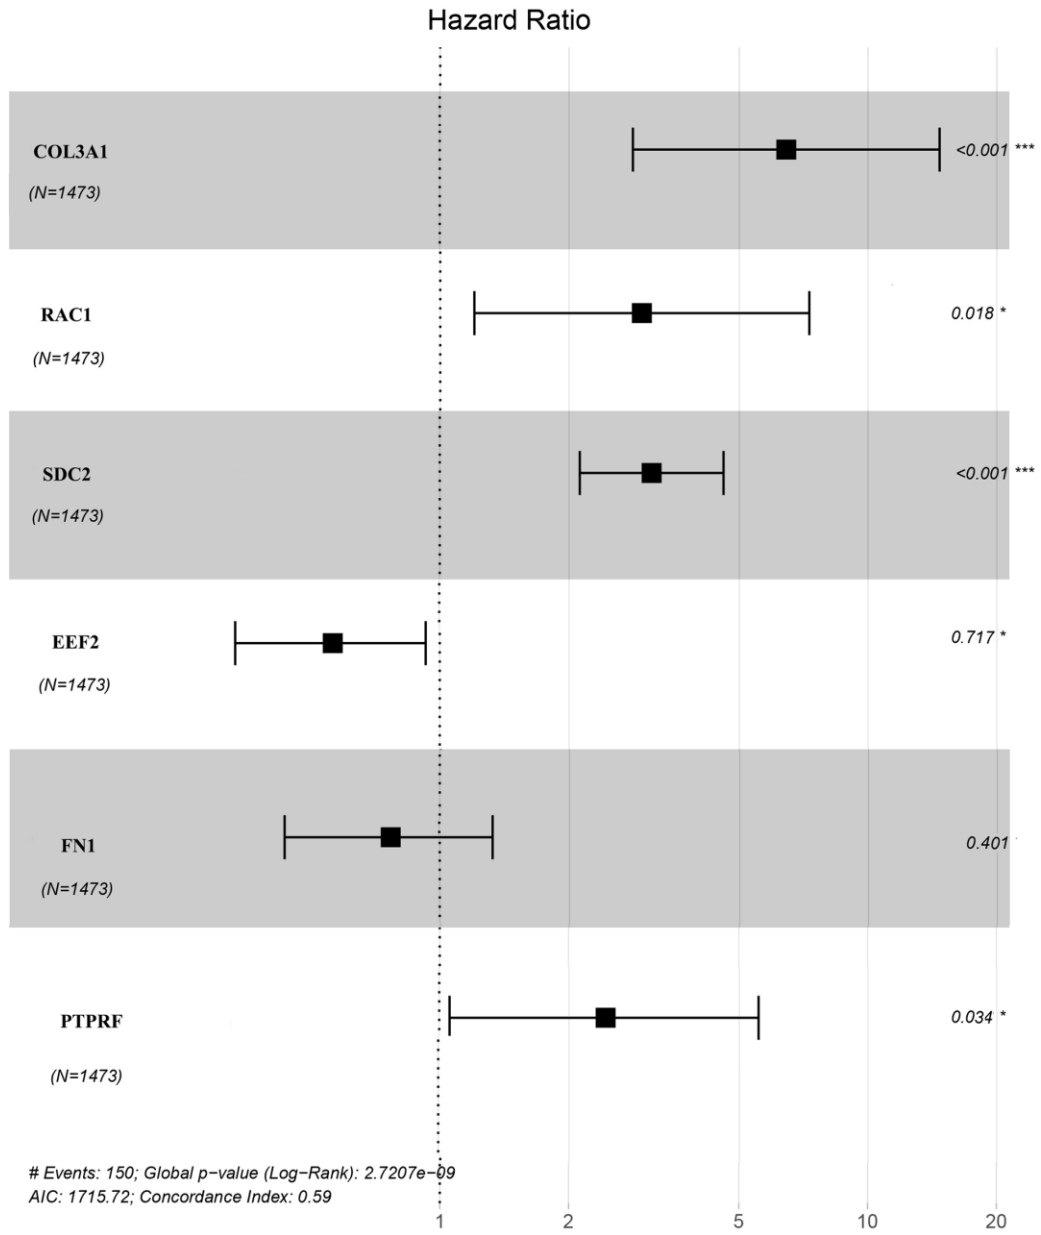

Supplementary Figure 1.

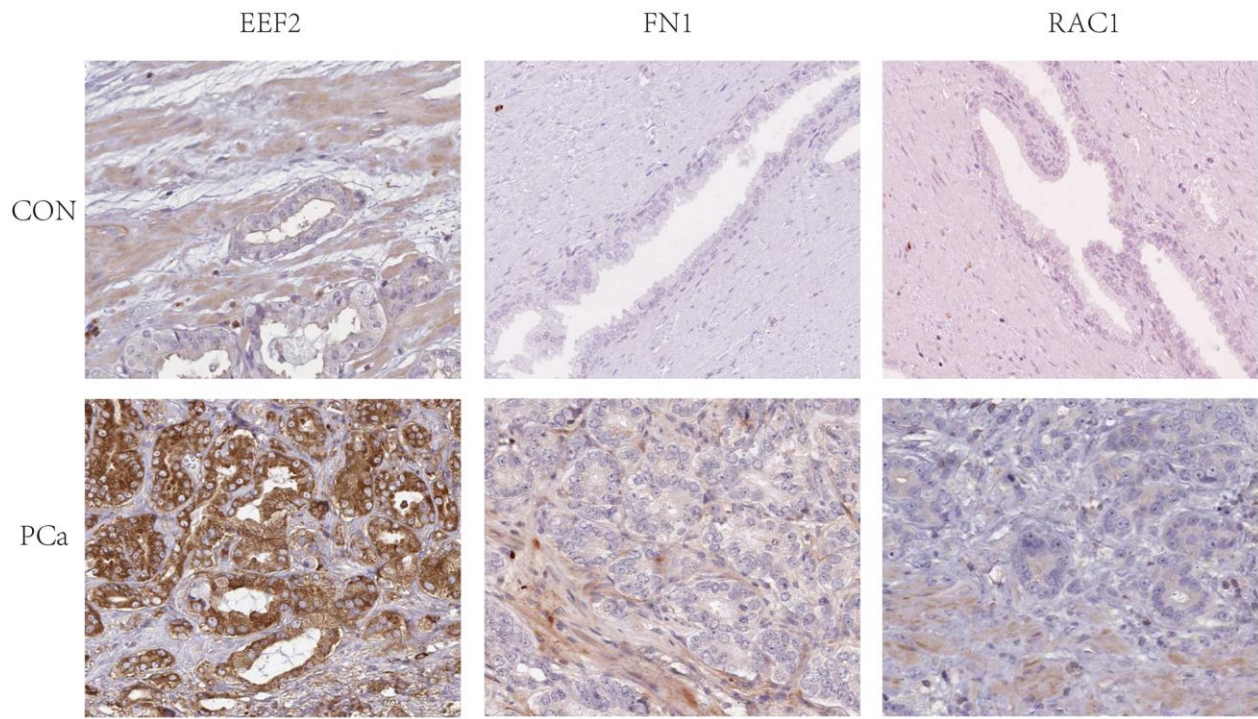

**Supplementary Figure 2.**
